# Supplementary material for: Determinants of HIV Testing Uptake Among People Who Use New Psychoactive Substances in Kazakhstan: A Multi-Regional Cross-Sectional Study
Source: MDPI journal article supplement (doi:10.3390/healthcare14091183), 2026-04-28
Supplement: s1 [file healthcare-4255354-supplementary.pdf › healthcare-4255354-supplementary.pdf]

Table S1. Sample characteristics by HIV testing status

| Characteristic                                                                                                                  | No<br>N = 200 <sup>1</sup> | Yes<br>N = 1,300 <sup>1</sup> | p-value <sup>2</sup> |
|---------------------------------------------------------------------------------------------------------------------------------|----------------------------|-------------------------------|----------------------|
| Substance use behavior                                                                                                          |                            |                               |                      |
| Marijuana use                                                                                                                   | 95 (48%)                   | 776 (60%)                     | 0.001                |
| Heroin (inj) use                                                                                                                | 96 (48%)                   | 667 (51%)                     | 0.4                  |
| Heroin (inh) use                                                                                                                | 100 (50%)                  | 681 (52%)                     | 0.5                  |
| Metadon (inj) use                                                                                                               | 96 (48%)                   | 620 (48%)                     | >0.9                 |
| Metadon (per oral) use                                                                                                          | 91 (46%)                   | 516 (40%)                     | 0.12                 |
| Psychostim (inj) use                                                                                                            | 85 (43%)                   | 690 (53%)                     | 0.005                |
| Psychostim (inh) use                                                                                                            | 106 (53%)                  | 569 (44%)                     | 0.015                |
| Mix (inj) use                                                                                                                   | 63 (32%)                   | 482 (37%)                     | 0.13                 |
| Mix (inh or per oral) use                                                                                                       | 92 (46%)                   | 679 (52%)                     | 0.10                 |
| Unsafe injection use                                                                                                            |                            |                               | 0.4                  |
| Never                                                                                                                           | 171 (86%)                  | 1,047 (81%)                   | 0.0946               |
| Ever                                                                                                                            | 29 (14.5%)                 | 253 (19.5%)                   |                      |
| Needle use after an HIV positive person                                                                                         | 103 (52%)                  | 623 (48%)                     | 0.3                  |
| HIV talk among users                                                                                                            |                            |                               | 0.002                |
| Sometimes                                                                                                                       | 66 (33%)                   | 567 (44%)                     |                      |
| Never                                                                                                                           | 111 (56%)                  | 544 (42%)                     |                      |
| Often                                                                                                                           | 23 (12%)                   | 186 (14%)                     |                      |
| Unknown                                                                                                                         | 0                          | 3                             |                      |
| Chemsex use                                                                                                                     | 108 (54%)                  | 744 (57%)                     | 0.4                  |
| Do you think sexual activity under the influence of drugs increases the risk of sexually transmitted infections (STIs) and HIV? | 82 (41%)                   | 551 (42%)                     | 0.7                  |
| Sexual behavior                                                                                                                 |                            |                               |                      |
| Paid sex for money and drugs                                                                                                    | 92 (46%)                   | 712 (55%)                     | 0.021                |
| Paid sex for food and stay                                                                                                      | 86 (43%)                   | 657 (51%)                     | 0.047                |
| Condom use for paid sex                                                                                                         |                            |                               | 0.269                |

| Characteristic                                                                              | No<br>N = 200 <sup>1</sup> | Yes<br>N = 1,300 <sup>1</sup> | p-value <sup>2</sup> |
|---------------------------------------------------------------------------------------------|----------------------------|-------------------------------|----------------------|
| Always                                                                                      | 40 (25%)                   | 223 (23%)                     |                      |
| Sometimes                                                                                   | 54 (34.0%)                 | 294 (29.7%)                   |                      |
| Never                                                                                       | 65 (41%)                   | 473 (48%)                     |                      |
| Number of sexual partners (past 3 months)                                                   |                            |                               | 0.0802               |
| 2 or less                                                                                   | 118 (62.1%)                | 832 (69.2%)                   |                      |
| 3 and more                                                                                  | 72 (37.9%)                 | 371 (30.8%)                   |                      |
| Anal sex with an irregular partner (past 3 months)                                          | 94 (47%)                   | 690 (53%)                     | 0.11                 |
| Structural access to services                                                               |                            |                               |                      |
| Received HIV prevention services                                                            | 122 (61%)                  | 535 (41%)                     | <0.001               |
| Where do you usually go to receive a medical treatment (not related to a substance use)     |                            |                               |                      |
| Outpatient public clinic                                                                    | 68 (34%)                   | 506 (39%)                     | 0.2                  |
| Hospital                                                                                    | 90 (45%)                   | 604 (46%)                     | 0.7                  |
| Outpatient private clinic                                                                   | 90 (45%)                   | 620 (48%)                     | 0.5                  |
| HIV prevention centers                                                                      | 92 (46%)                   | 465 (36%)                     | 0.005                |
| NGO                                                                                         | 83 (42%)                   | 610 (47%)                     | 0.2                  |
| What prevents you from injecting drugs safely (e.g., avoiding shared needles or equipment)? |                            |                               |                      |
| Withdrawal symptoms                                                                         | 71 (36%)                   | 416 (32%)                     | 0.3                  |
| Danger of being caught                                                                      | 90 (45%)                   | 571 (44%)                     | 0.8                  |
| Absence of the opportunity to buy a syringe                                                 | 97 (49%)                   | 643 (49%)                     | 0.8                  |
| Lack of money                                                                               | 93 (47%)                   | 609 (47%)                     | >0.9                 |
| Loss of control                                                                             | 71 (36%)                   | 428 (33%)                     | 0.5                  |
| Absence of HIV fear                                                                         | 88 (44%)                   | 557 (43%)                     | 0.8                  |
| Nothing                                                                                     | 104 (52%)                  | 724 (56%)                     | 0.3                  |
| What prevents you from always using condoms?                                                |                            |                               |                      |
| Loss of control <sup>2</sup>                                                                | 60 (30%)                   | 522 (40%)                     | 0.006                |
| Absence of HIV fear                                                                         | 103 (52%)                  | 607 (47%)                     | 0.2                  |
| Absence of the opportunity to buy a condom                                                  | 93 (47%)                   | 656 (50%)                     | 0.3                  |

| Characteristic                | No<br>N = 200 <sup>1</sup> | Yes<br>N = 1,300 <sup>1</sup> | p-value <sup>2</sup> |
|-------------------------------|----------------------------|-------------------------------|----------------------|
| Lack of money for a condom    | 88 (44%)                   | 635 (49%)                     | 0.2                  |
| Afraid to show fear           | 80 (40%)                   | 572 (44%)                     | 0.3                  |
| Partner refusal of condom use | 70 (35%)                   | 532 (41%)                     | 0.11                 |
| Nothing                       | 131 (66%)                  | 742 (57%)                     | 0.025                |
| Other                         | 96 (48%)                   | 668 (51%)                     | 0.4                  |

<sup>1</sup>Mean (SD); n (%)

<sup>2</sup>Wilcoxon rank sum test; NA; Pearson's Chi-squared test; Fisher's exact test

Table S2. Univariable logistic regression: HIV testing (Bonferroni selection)

Sociodemographic Factors

| Variable                                   | Term                         | OR (95% CI)       | p-value |
|--------------------------------------------|------------------------------|-------------------|---------|
| Age                                        | Age                          | 1.06 (1.04, 1.08) | <0.001  |
| Gender (Ref. Female)                       | Male                         | 1.08 (0.74, 1.55) | 0.666   |
| Residency (Ref. rural)                     | Urban                        | 0.42 (0.15, 0.96) | 0.0676  |
| Marital (Ref. Divorced/widowed)            | Married                      | 0.69 (0.39, 1.25) | 0.208   |
|                                            | Not married                  | 0.51 (0.34, 0.73) | <0.001  |
| Education (Ref. Bachelor and higher)       | Did not complete high school | 0.71 (0.41, 1.21) | 0.213   |
|                                            | High school                  | 1.55 (0.93, 2.49) | 0.0797  |
|                                            | Some technical               | 2.46 (1.47, 4.02) | <0.001  |
| Employment (Ref. Unemployed)               | Full time                    | 1.34 (0.92, 1.93) | 0.124   |
|                                            | Part time                    | 1.13 (0.77, 1.64) | 0.530   |
| Region (Ref. Astana)                       | Karaganda                    | 0.79 (0.49, 1.27) | 0.335   |
|                                            | Kostanay                     | 2.11 (1.19, 3.86) | 0.0121  |
|                                            | Oskemen                      | 1.18 (0.71, 1.98) | 0.517   |
|                                            | Petropavlovsk                | 0.71 (0.44, 1.14) | 0.156   |
|                                            | Shymkent                     | 2.24 (1.25, 3.13) | <0.001  |
| Income level (kzt) (Ref. 100 000 or below) | 200 000 and above            | 1.01 (0.70, 1.45) | 0.957   |
|                                            | 100 000 - 200 000            | 1.41 (0.99, 2.02) | 0.060   |

---

Substance Use Behavior

| predictor                                                                                                                                 | term  | OR_CI             | p.value |
|-------------------------------------------------------------------------------------------------------------------------------------------|-------|-------------------|---------|
| HIV talk among users                                                                                                                      | Never | 0.57 (0.41, 0.79) | <0.001  |
|                                                                                                                                           | Often | 0.94 (0.58, 1.59) | 0.814   |
| Marijuana (Ref. No)                                                                                                                       | Yes   | 1.63 (1.21, 2.21) | <0.001  |
| Psychostim (inj) (Ref. No)                                                                                                                | Yes   | 1.53 (1.13, 2.07) | <0.001  |
| Psychostim (inh) (Ref. No)                                                                                                                | Yes   | 0.69 (0.51, 0.93) | 0.015   |
| Mix (inh or per oral) (Ref. No)                                                                                                           | Yes   | 1.28 (0.95, 1.73) | 0.101   |
| Metadon (per oral) (Ref. No)                                                                                                              | Yes   | 0.79 (0.59, 1.06) | 0.120   |
| Mix (inj) (Ref. No)                                                                                                                       | Yes   | 1.28 (0.94, 1.77) | 0.128   |
| Heroin (inj) (Ref. No)                                                                                                                    | Yes   | 1.14 (0.84, 1.54) | 0.384   |
| Chemsex use (Ref. No)                                                                                                                     | Yes   | 1.14 (0.84, 1.54) | 0.391   |
| Heroin (inh) (Ref. No)                                                                                                                    | Yes   | 1.10 (0.82, 1.48) | 0.530   |
| Do you think sexual activity under the influence of drugs increases the risk of sexually transmitted infections (STIs) and HIV? (Ref. No) | Yes   | 1.06 (0.78, 1.44) | 0.712   |
| Metadon (inj) (Ref. No)                                                                                                                   | Yes   | 0.99 (0.73, 1.33) | 0.935   |
| Unsafe injection use (Ref. Never)                                                                                                         | Ever  | 1.43 (0.95, 2.2)  | 0.096   |
| Needle use after an HIV positive person (Ref. No)                                                                                         | Yes   | 0.87 (0.64, 1.17) | 0.346   |

Sexual Behavior

| predictor                              | term      | OR_CI             | p.value |
|----------------------------------------|-----------|-------------------|---------|
| Condom use for paid sex (Ref. Never)   | Always    | 0.75 (0.51, 1.11) | 0.144   |
|                                        | Sometimes | 0.77 (0.50, 1.18) | 0.219   |
| Paid sex for money and drugs (Ref. No) | Yes       | 1.42 (1.05, 1.92) | 0.021   |

---

| Characteristic                                                                          |            | No<br>N = 200 <sup>1</sup> | Yes<br>N = 1,300 <sup>1</sup> | p-value <sup>2</sup> |
|-----------------------------------------------------------------------------------------|------------|----------------------------|-------------------------------|----------------------|
| Paid sex for food and stay<br>(Ref. No)                                                 | Yes        |                            | 1.35 (1.00, 1.83)             | 0.047                |
| Anal sex with an irregular<br>partner (past 3 months)<br>(Ref. No)                      | Yes        |                            | 1.28 (0.95, 1.72)             | 0.110                |
| Number of sexual partners<br>(past 3 months) (Ref. 2 or<br>less)                        | 3 and more |                            | 0.73 (0.53, 1.01)             | 0.053                |
| Structural Access to Services                                                           |            |                            |                               |                      |
| predictor                                                                               | term       |                            | OR_CI                         | p.value              |
| Received HIV prevention services<br>(Ref. Yes)                                          | No         |                            | 0.44 (0.33, 0.61)             | <0.001               |
| Where do you usually go to receive a medical treatment (not related to a substance use) |            |                            |                               |                      |
| Outpatient public clinic (Ref. Yes)                                                     | No         |                            | 1.24 (0.91, 1.70)             | 0.183                |
| Hospital (Ref. Yes)                                                                     | No         |                            | 1.06 (0.79, 1.43)             | 0.700                |
| Outpatient private clinic (Ref. Yes)                                                    | No         |                            | 1.11 (0.83, 1.51)             | 0.478                |
| HIV prevention centers (Ref. Yes)                                                       | No         |                            | 0.65 (0.48, 0.89)             | <0.001               |
| NGO (Ref. Yes)                                                                          | No         |                            | 1.25 (0.92, 1.69)             | 0.153                |
| What prevents you from always using condoms?                                            |            |                            |                               |                      |
| Loss of control (Ref. No)                                                               | Yes        |                            | 1.56 (1.14, 2.17)             | <0.001               |

| Characteristic                                                                              |     | No<br>N = 200 <sup>1</sup> | Yes<br>N = 1,300 <sup>1</sup> | p-value <sup>2</sup> |
|---------------------------------------------------------------------------------------------|-----|----------------------------|-------------------------------|----------------------|
| Nothing (Ref. No)                                                                           | Yes |                            | 0.70 (0.51, 0.95)             | 0.025                |
| Partner refusal of condom use (Ref. No)                                                     | Yes |                            | 1.29 (0.95, 1.76)             | 0.112                |
| Lack of money for a condom (Ref. No)                                                        | Yes |                            | 1.21 (0.90, 1.64)             | 0.202                |
| Absence of HIV fear (Ref. No)                                                               | Yes |                            | 0.82 (0.61, 1.11)             | 0.205                |
| Afraid to show fear (Ref. No)                                                               | Yes |                            | 1.18 (0.87, 1.60)             | 0.288                |
| Absence of the opportunity to buy a condom (Ref. No)                                        | Yes |                            | 1.17 (0.87, 1.58)             | 0.297                |
| What prevents you from injecting drugs safely (e.g., avoiding shared needles or equipment)? |     |                            |                               |                      |
| Withdrawal symptoms (Ref. No)                                                               | Yes |                            | 0.86 (0.63, 1.17)             | 0.325                |
| Nothing (Ref. No)                                                                           | Yes |                            | 1.16 (0.86, 1.56)             | 0.329                |
| Other (Ref. No)                                                                             | Yes |                            | 1.15 (0.85, 1.54)             | 0.373                |
| Loss of control (Ref. No)                                                                   | Yes |                            | 0.89 (0.66, 1.22)             | 0.472                |
| Absence of fear (Ref. No)                                                                   | Yes |                            | 0.95 (0.71, 1.29)             | 0.759                |
| Danger of being caught (Ref. No)                                                            | Yes |                            | 0.96 (0.71, 1.30)             | 0.782                |
| Absence of the opportunity to buy a syringe (Ref. No)                                       | Yes |                            | 1.04 (0.77, 1.40)             | 0.800                |
| Lack of money (Ref. No)                                                                     | Yes |                            | 1.01 (0.75, 1.37)             | 0.927                |

Table S3. Model Fit Statistics

| Statistic               | Value |
|-------------------------|-------|
| N (complete cases)      | 1,482 |
| AIC                     | 1,059 |
| Mcfadden R <sup>2</sup> | 0.109 |
| AUC                     | 0.725 |

Table S4. Supplementary Sensitivity Analyses

| Term                                                         | OR (95%CI)         | p_value |
|--------------------------------------------------------------|--------------------|---------|
| Main model + sexual behavior variables                       |                    |         |
| Age                                                          | 1.10 (1.04, 1.16)  | <0.01   |
| Marital (Ref. Divorced/widowed)                              |                    |         |
| Married                                                      | 0.49 (0.11, 2.42)  | 0.362   |
| Not married                                                  | 0.49 (0.14, 1.42)  | 0.212   |
| Education (Ref. Bachelor and higher)                         |                    |         |
| Did not complete high school                                 | 0.14 (0.02, 0.81)  | 0.034   |
| High school                                                  | 0.66 (0.13, 2.67)  | 0.579   |
| Some technical                                               | 1.67 (0.32, 7.06)  | 0.503   |
| HIV talk among users                                         |                    |         |
| Never                                                        | 1.22 (0.49, 3.10)  | 0.669   |
| Often                                                        | 2920469.27 (0, NA) | 0.986   |
| Psychostim (inj) (Ref. No)                                   |                    |         |
| Yes                                                          | 1.30 (0.44, 4.03)  | 0.641   |
| Marijuana (Ref. No)                                          |                    |         |
| Yes                                                          | 2.30 (0.68, 9.60)  | 0.208   |
| Received HIV prevention services (Ref. Yes)                  |                    |         |
| No                                                           | 0.93 (0.27, 3.48)  | 0.906   |
| HIV prevention centers (Ref. Yes)                            |                    |         |
| No                                                           | 5.89 (1.51, 40.48) | 0.027   |
| What prevents you from injecting drugs safely?               |                    |         |
| Loss of control (Ref. No)                                    |                    |         |
| Yes                                                          | 1.21 (0.28, 5.38)  | 0.799   |
| Paid sex for money and drugs (Ref. No)                       |                    |         |
| Yes                                                          | 1.06 (0.14, 13.10) | 0.955   |
| Paid sex for food and stay (Ref. No)                         |                    |         |
| Yes                                                          | 0.68 (0.03, 32.22) | 0.828   |
| Condom use for paid sex (Ref. Never)                         |                    |         |
| Always                                                       | 1.82 (0.15, 18.44) | 0.618   |
| Sometimes                                                    | 0.84 (0.06, 9.75)  | 0.887   |
| Anal sex with an irregular partner (past 3 months) (Ref. No) |                    |         |
| Yes                                                          | 6.58 (1.05, 81.53) | 0.077   |
| Restricted: no HIV prevention services                       |                    |         |
| Age                                                          | 1.16 (1.07, 1.28)  | <0.001  |
| Marital (Ref. Divorced/widowed)                              |                    |         |

| Term                                                         | OR (95%CI)                            | p_value                |       |
|--------------------------------------------------------------|---------------------------------------|------------------------|-------|
|                                                              | Married                               | 0.14 (0.01, 1.21)      | 0.085 |
|                                                              | Not married                           | 0.53 (0.06, 2.88)      | 0.496 |
| Education (Ref. Bachelor and higher)                         |                                       |                        |       |
|                                                              | Did not complete high school          | 0.05 (0.01, 0.59)      | 0.027 |
|                                                              | High school                           | 0.86 (0.13, 4.84)      | 0.863 |
|                                                              | Some technical                        | 2.91 (0.42, 18.64)     | 0.257 |
| HIV talk among users                                         |                                       |                        |       |
|                                                              | Never                                 | 0.60 (0.17, 2.01)      | 0.420 |
|                                                              | Often                                 | 0.79 (0, 1)            | 1.000 |
| Psychostim (inj) (Ref. No)                                   | Yes                                   | 1.57 (0.39, 7.12)      | 0.537 |
| Marijuana (Ref. No)                                          | Yes                                   | 1.60 (0.25, 17.36)     | 0.650 |
| Received HIV prevention services (Ref. Yes)                  | No                                    | 13.43 (0, 192.1)       | 0.994 |
| What prevents you from injecting drugs safely?               |                                       |                        |       |
| Loss of control (Ref. No)                                    | Yes                                   | 9762.88 (0, NA)        | 0.997 |
| Paid sex for money and drugs (Ref. No)                       | Yes                                   | 0.17 (0.004, 5.61)     | 0.280 |
| Paid sex for food and stay (Ref. No)                         | Yes                                   | 44103743.70 (0, Inf)   | 0.999 |
| Condom use for paid sex (Ref. Never)                         | Always                                | 18952854.18 (0, NA)    | 0.997 |
|                                                              | Sometimes                             | 22524287.47 (0, NA)    | 0.997 |
| Anal sex with an irregular partner (past 3 months) (Ref. No) | Yes                                   | 2339968843.35 (0, Inf) | 0.998 |
|                                                              | Restricted: no HIV prevention centers |                        |       |
| Age                                                          |                                       | 1.08 (1.03, 1.15)      | 0.004 |
| Marital (Ref. Divorced/widowed)                              | Married                               | 0.47 (0.10, 2.34)      | 0.341 |
|                                                              | Not married                           | 0.55 (0.16, 1.68)      | 0.317 |
| Education (Ref. Bachelor and higher)                         |                                       |                        |       |
|                                                              | Did not complete high school          | 0.16 (0.02, 0.96)      | 0.053 |
|                                                              | High school                           | 0.62 (0.11, 2.6)       | 0.531 |
|                                                              | Some technical                        | 1.51 (0.28, 6.60)      | 0.597 |
| HIV talk among users                                         |                                       |                        |       |
|                                                              | Never                                 | 0.97 (0.37, 2.52)      | 0.947 |
|                                                              | Often                                 | 27.07 (0, Inf)         | 0.989 |
| Psychostim (inj) (Ref. No)                                   | Yes                                   | 1.10 (0.36, 3.56)      | 0.860 |
| Marijuana (Ref. No)                                          | Yes                                   | 2.26 (0.66, 9.56)      | 0.220 |
| Received HIV prevention services (Ref. Yes)                  | No                                    | 0.93 (0.27, 3.48)      | 0.906 |
| What prevents you from injecting drugs safely?               |                                       |                        |       |
| Loss of control (Ref. No)                                    | Yes                                   | 0.77 (0.15, 3.97)      | 0.758 |
| Paid sex for money and drugs (Ref. No)                       | Yes                                   | 0.81 (0.10, 9.89)      | 0.852 |
| Paid sex for food and stay (Ref. No)                         |                                       |                        |       |

| Term                                                            | OR (95%CI)                   | p_value |
|-----------------------------------------------------------------|------------------------------|---------|
|                                                                 | Yes 0.43 (0.01, 23.70)       | 0.651   |
| Condom use for paid sex (Ref. Never)                            | Always 2.53 (0.19, 28.66)    | 0.454   |
|                                                                 | Sometimes 2.36 (0.14, 42.31) | 0.544   |
| Anal sex with an irregular partner (past 3 months)<br>(Ref. No) | Yes 25.23 (1.92, 1316.97)    | 0.048   |

This supplementary analysis evaluates whether the main findings remain robust after inclusion of sexual behavior variables and under sample restrictions designed to approximate lower service engagement and urban-only participation.
